# Supplementary material for: The impact of ionic liquid fluorinated moieties on their thermophysical properties and aqueous phase behaviour
Source: Royal Society of Chemistry journal article supplement (doi:10.1039/c4cp02008a), 2014-01-01
Supplement: c4cp02008a1.pdf [file c4cp02008a1.pdf]

## Electronic Supplementary Information†

# The impact of ionic liquids fluorinated moieties on their thermophysical properties and aqueous phase behaviour

*Catarina M. S. S. Neves,<sup>a</sup> Kiki Adi Kurnia,<sup>a</sup> Karina Shimizu,<sup>\*b</sup> Isabel M. Marrucho,<sup>c</sup>  
Luís Paulo N. Rebelo,<sup>c</sup> João A. P. Coutinho,<sup>a</sup> Mara G. Freire,<sup>\*a</sup> José N. Canongia  
Lopes<sup>bc</sup>*

<sup>a</sup>Departamento de Química, CICECO, Universidade de Aveiro, 3810-193 Aveiro,  
Portugal

<sup>b</sup>Centro de Química Estrutural, Instituto Superior Técnico, Universidade de Lisboa,  
1049-001 Lisboa, Portugal

<sup>c</sup>Instituto de Tecnologia Química e Biológica, ITQB2, Universidade Nova de Lisboa  
([www.itqb.unl.pt](http://www.itqb.unl.pt)), Av. República, Apartado 127, 2780-901 Oeiras, Portugal

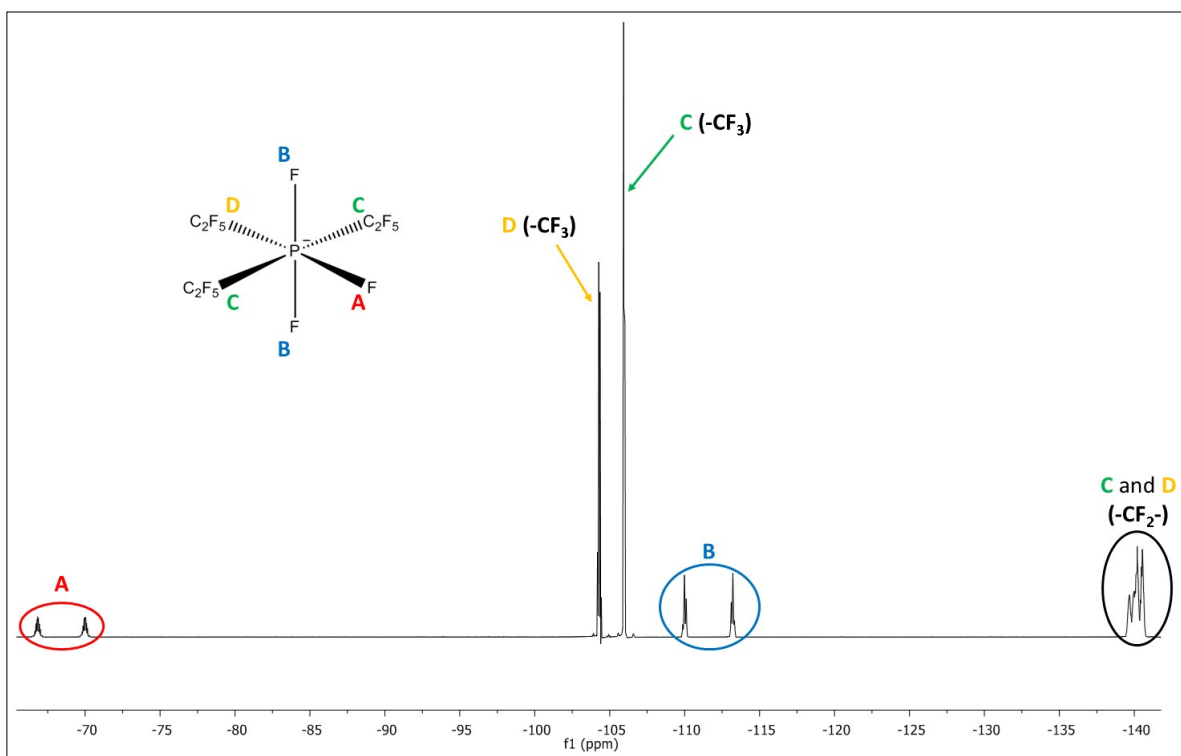

**Fig. S1.**  $^{19}\text{F}$  NMR spectra of  $[\text{C}_2\text{C}_1\text{im}][\text{FAP}]$ .

**Table S1.** Experimental density,  $\rho$ , and viscosity,  $\eta$ , for pure ILs as function of temperature and at 0.1 MPa.

| $T / \text{K}$ | $\rho / (\text{kg}\cdot\text{m}^{-3})$        |                                                | $\eta / (\text{mPa}\cdot\text{s})$            |                                                |
|----------------|-----------------------------------------------|------------------------------------------------|-----------------------------------------------|------------------------------------------------|
|                | $[\text{C}_2\text{C}_1\text{im}][\text{FAP}]$ | $[\text{C}_2\text{C}_1\text{im}][\text{PF}_6]$ | $[\text{C}_2\text{C}_1\text{im}][\text{FAP}]$ | $[\text{C}_2\text{C}_1\text{im}][\text{PF}_6]$ |
| 278.15         | 1726.7                                        | ---                                            | 168.750                                       | ---                                            |
| 283.15         | 1720.6                                        | ---                                            | 126.710                                       | ---                                            |
| 288.15         | 1714.5                                        | ---                                            | 97.357                                        | ---                                            |
| 293.15         | 1708.1                                        | ---                                            | 76.410                                        | ---                                            |
| 298.15         | 1701.6                                        | ---                                            | 61.022                                        | ---                                            |
| 303.15         | 1695.0                                        | ---                                            | 49.617                                        | ---                                            |
| 308.15         | 1688.3                                        | ---                                            | 40.934                                        | ---                                            |
| 313.15         | 1681.6                                        | ---                                            | 34.213                                        | ---                                            |
| 318.15         | 1674.9                                        | ---                                            | 28.934                                        | ---                                            |
| 323.15         | 1668.2                                        | ---                                            | 24.722                                        | ---                                            |
| 328.15         | 1661.5                                        | ---                                            | 21.327                                        | ---                                            |
| 333.15         | 1654.8                                        | ---                                            | 18.552                                        | ---                                            |
| 338.15         | 1648.4                                        | 1437.6                                         | 16.263                                        | 26.830                                         |
| 343.15         | 1641.9                                        | 1433.3                                         | 14.355                                        | 23.296                                         |
| 348.15         | 1635.4                                        | 1429.1                                         | 12.726                                        | 20.330                                         |
| 353.15         | 1629.1                                        | 1424.8                                         | 11.371                                        | 17.920                                         |
| 358.15         | 1622.8                                        | 1420.6                                         | 10.216                                        | 15.810                                         |
| 363.15         | 1616.6                                        | 1416.4                                         | 9.223                                         | 14.075                                         |

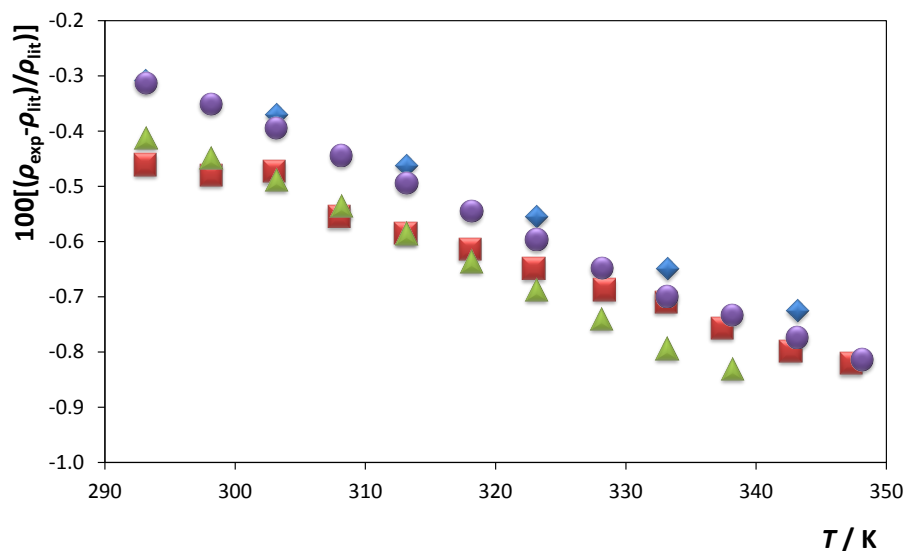

**Fig. S2.** Relative deviations between the experimental densities measured in this work ( $\rho_{\text{exp}}$ ) and those reported in literature ( $\rho_{\text{lit}}$ ) as a function of temperature for  $[\text{C}_2\text{C}_1\text{im}][\text{FAP}]$ :  $\triangle$ , Sekiet al.<sup>1</sup>;  $\square$ , Liu et al.<sup>2</sup>;  $\diamond$ , Almantariotis et al.<sup>3</sup>;  $\circ$ , Součková et al.<sup>4</sup>.

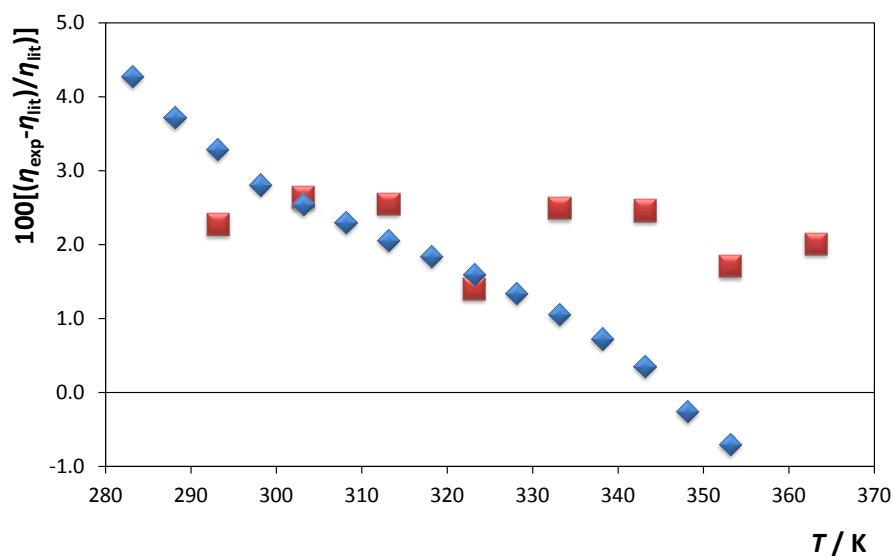

**Fig. S3.** Relative deviations between the experimental viscosities measured in this work ( $\eta_{\text{exp}}$ ) and those reported in literature ( $\eta_{\text{lit}}$ ) as a function of temperature for  $[\text{C}_2\text{C}_1\text{im}][\text{FAP}]$ :  $\diamond$ , Sekiet al.<sup>1</sup>;  $\circ$ , Almantariotis et al.<sup>3</sup>.

**Table S2.** Experimental mole fraction solubility of water in ILs,  $x_w$ , and of ILs in water,  $x_{IL}$ , as a function of temperature and at 0.1 MPa.

| $T / K$ | [C <sub>2</sub> C <sub>1</sub> im][FAP] |                                  | [C <sub>2</sub> C <sub>1</sub> im][PF <sub>6</sub> ] |                    |
|---------|-----------------------------------------|----------------------------------|------------------------------------------------------|--------------------|
|         | $10^5 \times (x_{IL} \pm \sigma^a)$     | $10^1 \times (x_w \pm \sigma^a)$ | $10^2 \times (x_{IL} \pm \sigma^a)$                  | $x_w \pm \sigma^a$ |
| 288.15  | $0.999 \pm 0.014$                       | $0.577 \pm 0.008$                | $0.167 \pm 0.003$                                    | ---                |
| 293.15  | $1.325 \pm 0.034$                       | $0.614 \pm 0.021$                | $0.260 \pm 0.008$                                    | ---                |
| 298.15  | $1.624 \pm 0.024$                       | $0.682 \pm 0.011$                | $0.288 \pm 0.002$                                    | ---                |
| 303.15  | $1.805 \pm 0.019$                       | $0.769 \pm 0.006$                | $0.567 \pm 0.005$                                    | ---                |
| 308.15  | $1.965 \pm 0.238$                       | $0.835 \pm 0.018$                | $0.848 \pm 0.006$                                    | ---                |
| 313.15  | $2.164 \pm 0.041$                       | $0.923 \pm 0.022$                | $1.027 \pm 0.003$                                    | ---                |
| 318.15  | $2.483 \pm 0.009$                       | $1.010 \pm 0.018$                | $1.148 \pm 0.004$                                    | ---                |
| 333.15  | $3.011 \pm 0.066$                       | $1.387 \pm 0.001$                | $1.785 \pm 0.082$                                    | ---                |
| 338.15  | $3.313 \pm 0.007$                       | $1.541 \pm 0.012$                | $1.973 \pm 0.072$                                    | ---                |
| 343.15  | $3.643 \pm 0.036$                       | $1.633 \pm 0.070$                | $2.191 \pm 0.078$                                    | $0.644 \pm 0.015$  |
| 348.15  | $3.845 \pm 0.004$                       | $1.756 \pm 0.018$                | $2.365 \pm 0.086$                                    | $0.694 \pm 0.024$  |
| 353.15  | $4.070 \pm 0.010$                       | $1.831 \pm 0.006$                | $2.529 \pm 0.083$                                    | $0.733 \pm 0.011$  |
| 358.15  | $4.499 \pm 0.021$                       | $1.947 \pm 0.007$                | $2.712 \pm 0.079$                                    | $0.765 \pm 0.004$  |
| 363.15  | $4.753 \pm 0.058$                       | $2.073 \pm 0.024$                | $2.934 \pm 0.073$                                    | $0.802 \pm 0.074$  |

<sup>a</sup> Standard deviation

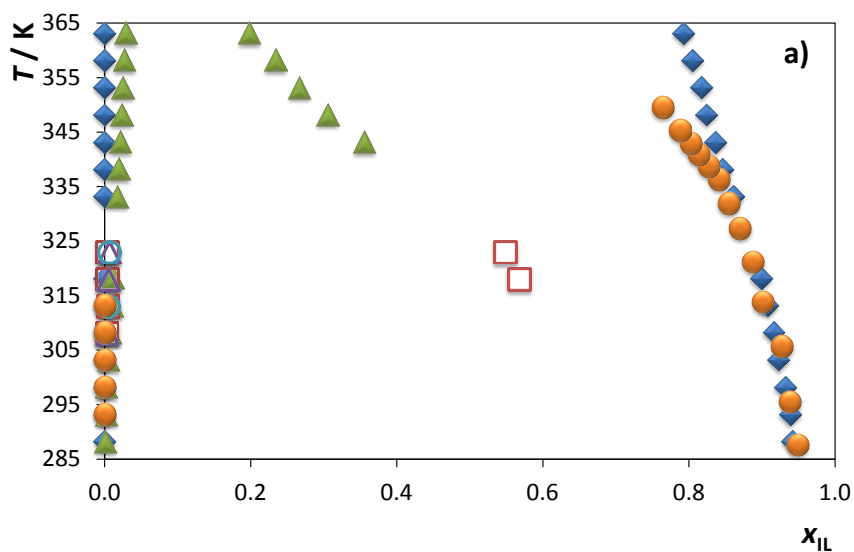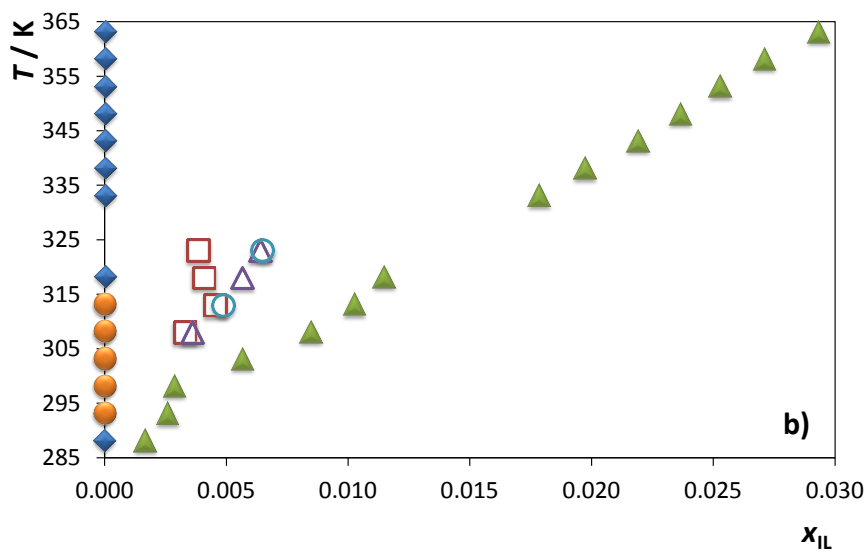

**Fig. S4.** LLE phase diagrams obtained in this work ( $\square$ ,  $[\text{C}_2\text{C}_1\text{im}][\text{PF}_6]$ ;  $\blacklozenge$ ,  $[\text{C}_2\text{C}_1\text{im}][\text{FAP}]$ ) and those reported in literature:  $\bullet$ , Wong et al.<sup>5</sup> with values obtained by KF;  $\circ$ , Wong et al.<sup>5</sup> with values obtained by UV;  $\square$ , Wong et al.<sup>5</sup> with values obtained by TGA;  $\circ$ , Domańska et al.<sup>6</sup> with values obtained by UV (solubility of IL in water) and dynamic (synthetic) method (solubility of water in IL).

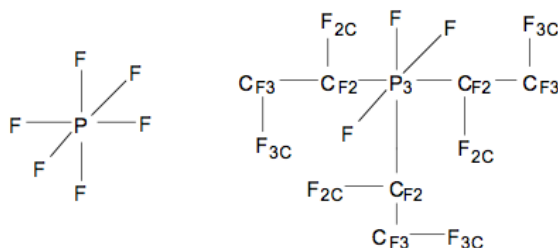

**Fig. S4.** Nomenclature adopted for the atomistic force-field modeling of the  $[\text{PF}_6]^-$  (left) and  $[\text{FAP}]^-$  (right) anions (equivalent atoms are not shown in the latter scheme for clarity reasons).

**Table S1.** Force field non-bonded parameters - atomic point charges ( $q$ ), Lennard-Jones diameter and interaction parameters ( $\sigma_{\text{LJ}}$  and  $\varepsilon_{\text{LJ}}$ ) - for the  $[\text{PF}_6]^-$  and  $[\text{FAP}]^-$  anions adopted in this work.<sup>7-10</sup> The different partial charges conferred to each type of atom in the two ions are highlighted in bold. These were calculated using quantum-mechanics methods described in literature.<sup>8-10</sup>

| $[\text{PF}_6]^-$ <sup>7-9</sup> |              |                                             |                                      |
|----------------------------------|--------------|---------------------------------------------|--------------------------------------|
| atom                             | $q$ (a.c.u.) | $\sigma_{\text{LJ}}$ ( $10^{-10}\text{m}$ ) | $\varepsilon_{\text{LJ}}$ / (kJ/mol) |
| P                                | <b>1.34</b>  | 3.74                                        | 0.8368                               |
| F                                | <b>-0.39</b> | 3.12                                        | 0.2552                               |
| $[\text{FAP}]^-$ <sup>10</sup>   |              |                                             |                                      |
| P3                               | <b>0.62</b>  | 3.74                                        | 0.8368                               |
| CF2                              | <b>0.24</b>  | 3.50                                        | 0.27614                              |
| F2C                              | <b>-0.12</b> | 3.12                                        | 0.2552                               |
| CF3                              | <b>0.42</b>  | 3.50                                        | 0.27614                              |
| F3C                              | <b>-0.19</b> | 3.12                                        | 0.2552                               |

## References

1. S. Seki, N. Serizawa, K. Hayamizu, S. Tsuzuki, Y. Umebayashi, K. Takei, and H. Miyashiro, *J. Electrochem. Soc.*, 2012, **159**, A967–A971.
2. Q.-S. Liu, J. Tong, Z.-C. Tan, U. Welz-Biermann, and J.-Z. Yang, *J. Chem. Eng. Data*, 2010, **55**, 2586–2589.
3. D. Almantariotis, S. Stevanovic, O. Fandiño, A. S. Pensado, A. A. H. Pádua, J.-Y. Coxam, and M. F. Costa Gomes, *J. Phys. Chem. B*, 2012, **116**, 7728–38.
4. M. Součková, J. Klomfar, and J. Pátek, *J. Chem. Thermodyn.*, 2012, **48**, 267–275.

5. D. S. H. Wong, J. P. Chen, J. M. Chang, and C. H. Chou, *Fluid Phase Equilib.*, 2002, **194–197**, 1089–1095.
6. U. Domańska, M. Królikowski, A. Pobudkowska, and P. Bocheńska, *J. Chem. Thermodyn.*, 2012, **55**, 225–233.
7. G. A. Kaminski and W. L. , *Perkin Trans.* **1999**, 2, 2365-2376.
8. J. N. Canongia Lopes, J. Deschamps, and A. A. H. Pádua, *J. Phys. Chem. B*, 2004, **108**, 2038–2047.
9. J. N. Canongia Lopes and A. A. H. Pádua, *J. Phys. Chem. B*, 2004, **108**, 16893–16898.
10. K. Shimizu, D. Almantariotis, M. F. Costa Gomes, A. A. H. Pádua, and J. N. Canongia Lopes, *J. Phys. Chem. B*, 2010, **114**, 3592–600.
